# Supplementary material for: Chemical Modifications to Enhance the Drug Properties of a VIP Receptor Antagonist (ANT) Peptide
Source: MDPI journal article supplement (doi:10.3390/ijms25084391), 2024-04-16
Supplement: s1 [file s1]

**Supplementary Materials:**

1. HPLC and MS spectra ..... 2

1.1. Peptide-PEG SDS-PAGE ..... 7

1.2. Additional Peptide Sequences..... 8

1.3. Plasma Stability T Cell Activation Study ..... 9

## 1. HPLC and MS Spectra

| Peptide             | MW      | 6M <sup>6+</sup><br>calc | 6M <sup>6+</sup><br>exp | 5M <sup>5+</sup><br>calc | 5M <sup>5+</sup><br>exp | 4M <sup>4+</sup><br>calc | 4M <sup>4+</sup><br>exp | 3M <sup>3+</sup><br>calc | 3M <sup>3+</sup><br>exp |
|---------------------|---------|--------------------------|-------------------------|--------------------------|-------------------------|--------------------------|-------------------------|--------------------------|-------------------------|
| ANT308              | 3466.16 | 578.70                   | 578.67                  | 694.23                   | 694.20                  | 867.55                   | 867.50                  | 1156.39                  | 1156.33                 |
| AcANT308            | 3505.98 | 585.71                   | 585.67                  | 702.66                   | 702.60                  | 878.07                   | 878.00                  | 1170.42                  | 1170.33                 |
| ANT308K             | 3620.27 | 604.39                   | 604.35                  | 725.06                   | 725.02                  | 906.07                   | 906.02                  | 1207.76                  | 1207.70                 |
| ANT308C1<br>3C17    | 3425.86 | 571.98                   | 572.15                  | 686.18                   | 686.58                  | 857.47                   | 857.72                  | 1142.96                  | 1143.30                 |
| ANT308C1<br>3C17stp | 3530.23 | 589.38                   | 589.33                  | 707.05                   | 706.99                  | 883.56                   | 883.49                  | 1177.75                  | 1177.65                 |

### ANT308

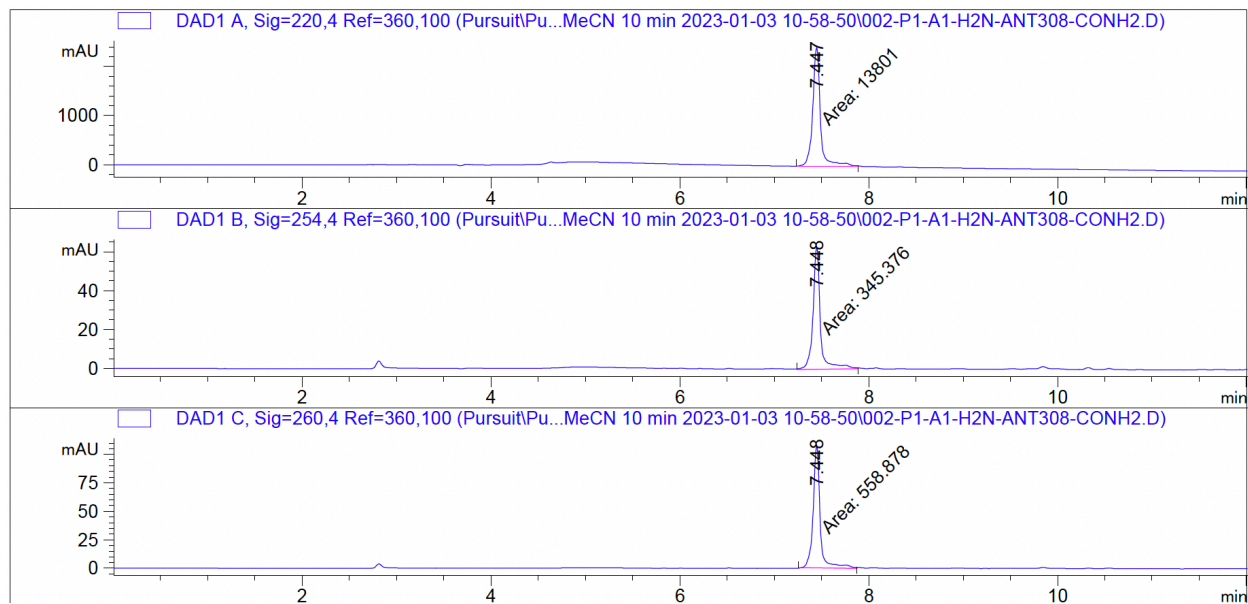

EX2995 #18-536 RT: 0.16-4.68 AV: 519 NL: 6.39E+007  
T: FTMS + p ESI Full ms [300.0000-4000.0000]

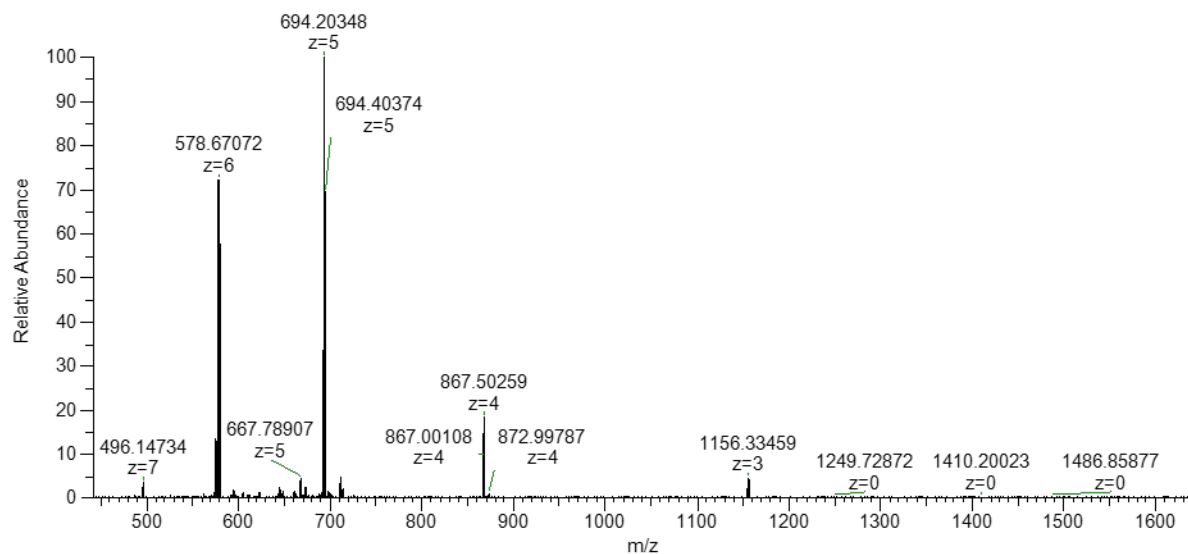

## Ac-ANT308

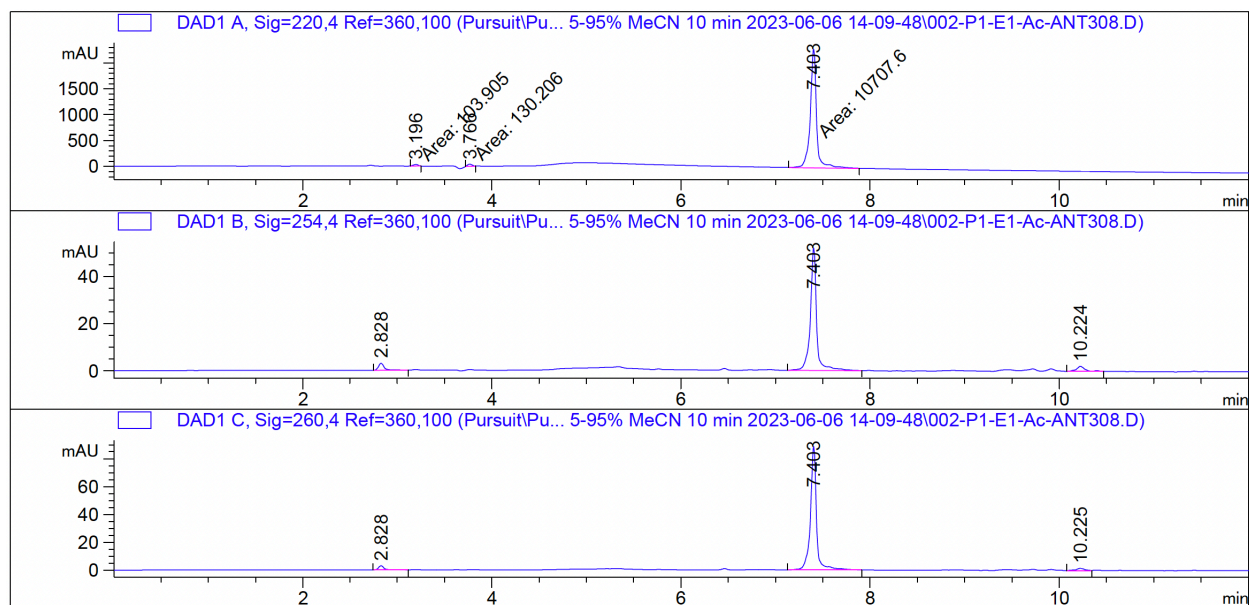

EX28423 #3-91 RT: 0.03-0.79 AV: 89 NL: 6.01E+007  
T: FTMS + p ESI Full ms [400.0000-4000.0000]

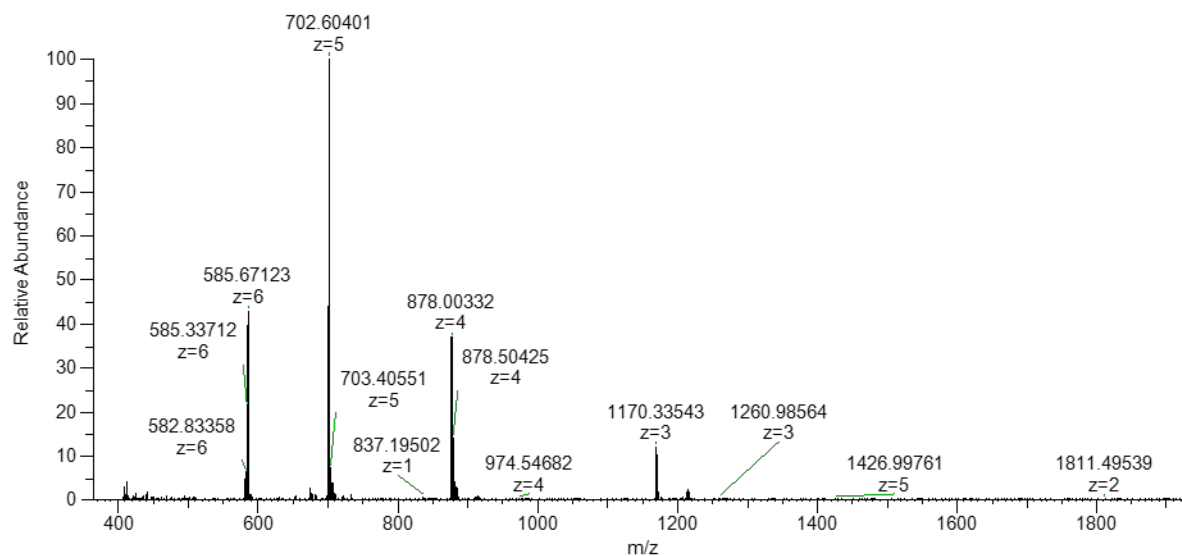

### ANT308K<sub>N3</sub>

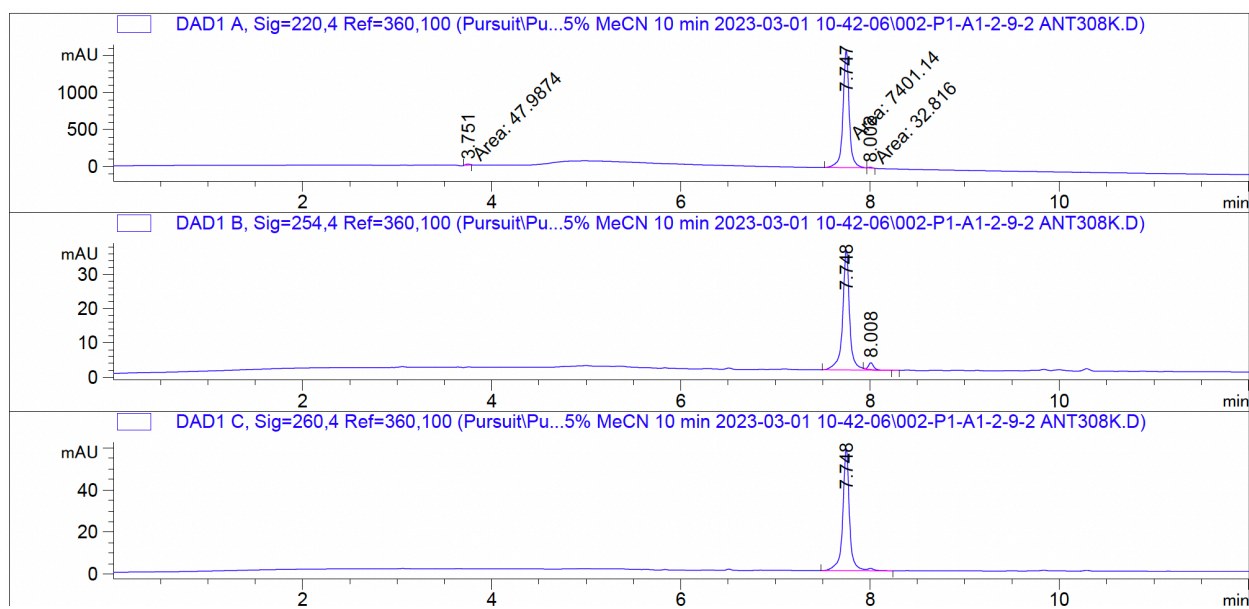

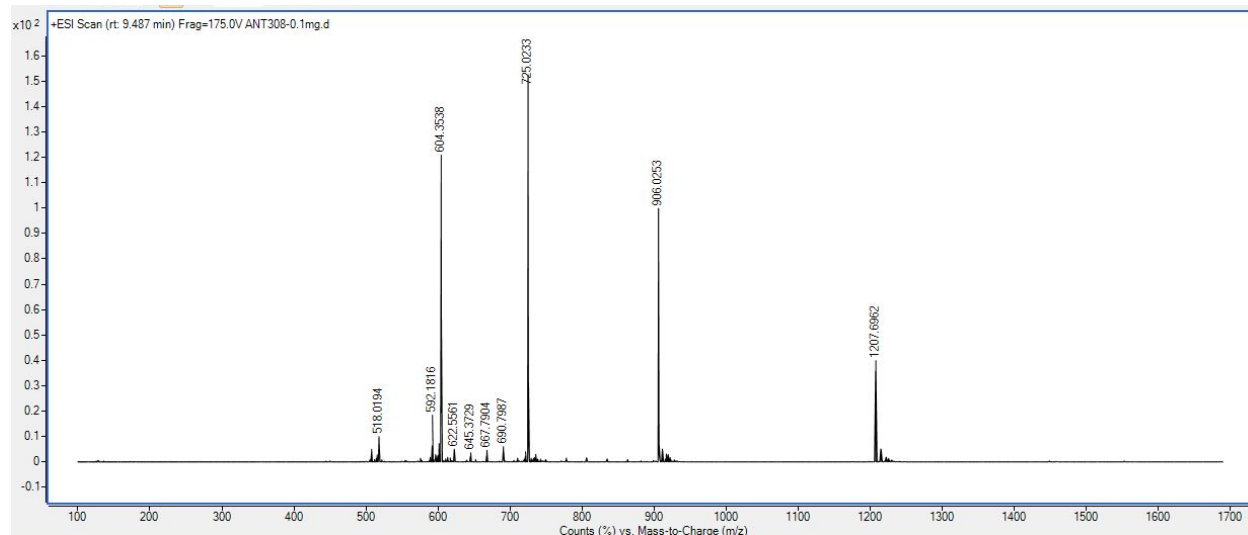

## ANT308C13C17

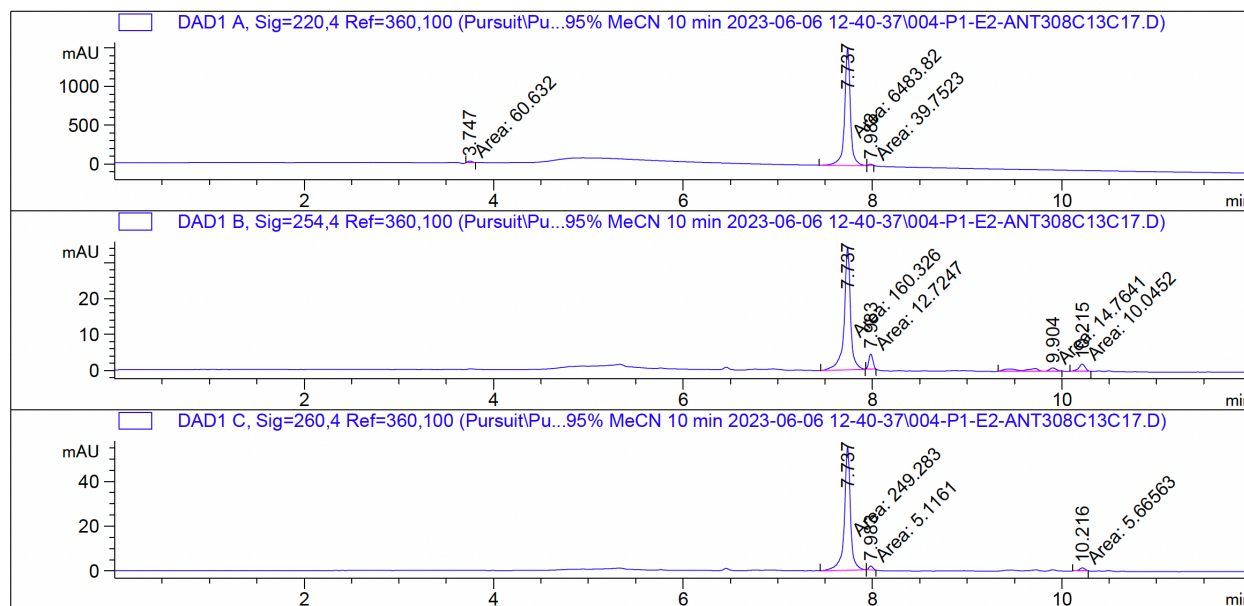

EX3248\_20210908122621 #3-54 RT: 0.03-0.47 AV: 52 NL: 5.43E7  
T: FTMS + p ESI Full ms [300.0000-2000.0000]

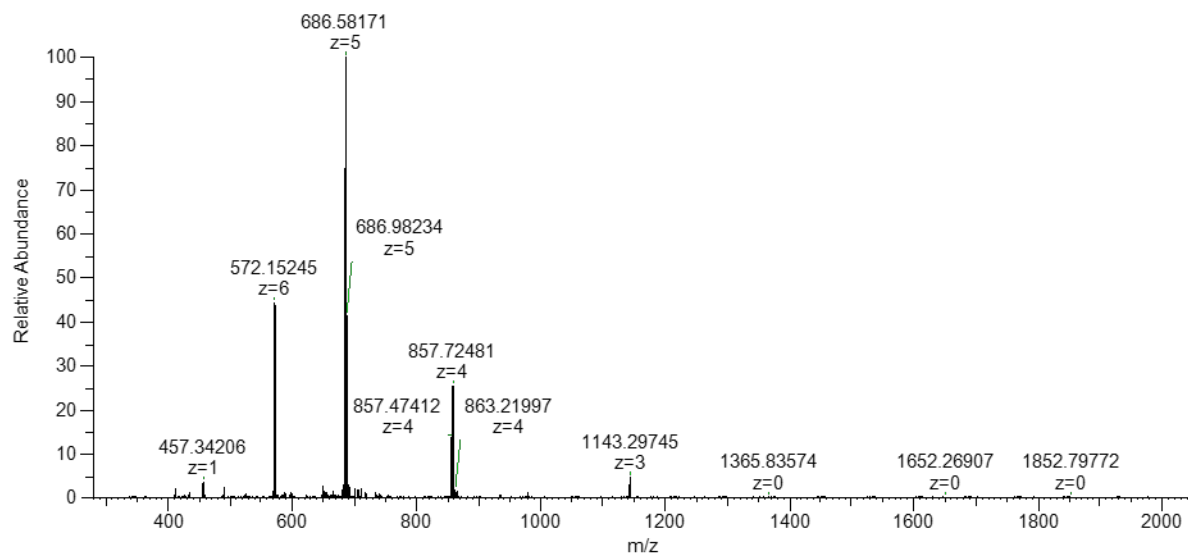

## ANT308C13C17 stp

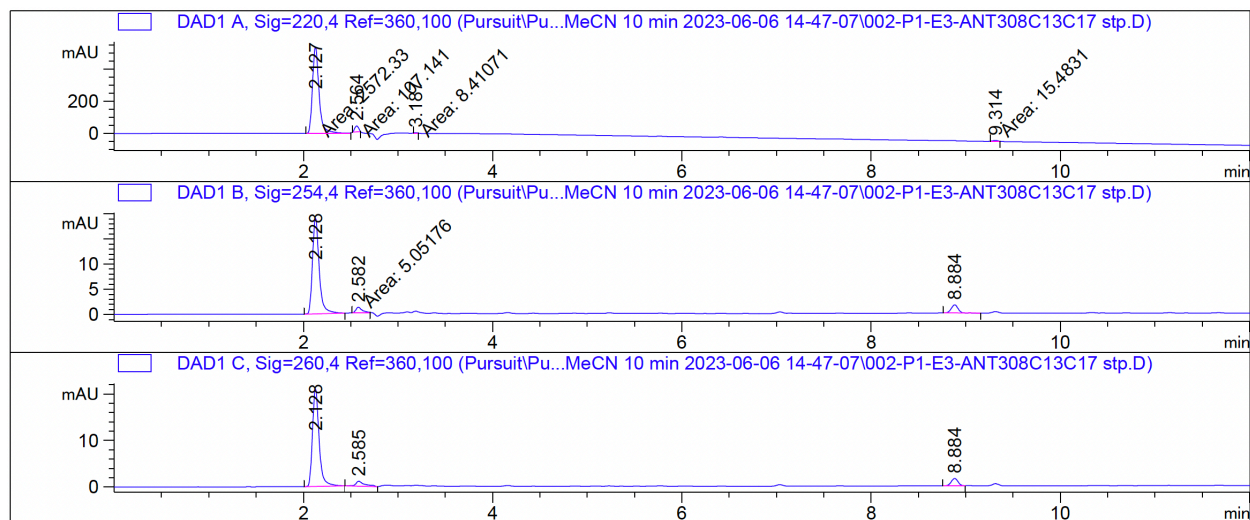

EX3291 #3-126 RT: 0.03-1.1 AV: 124 NL: 3.92E7  
T: FTMS + p ESI Full ms [400.0000-2000.0000]

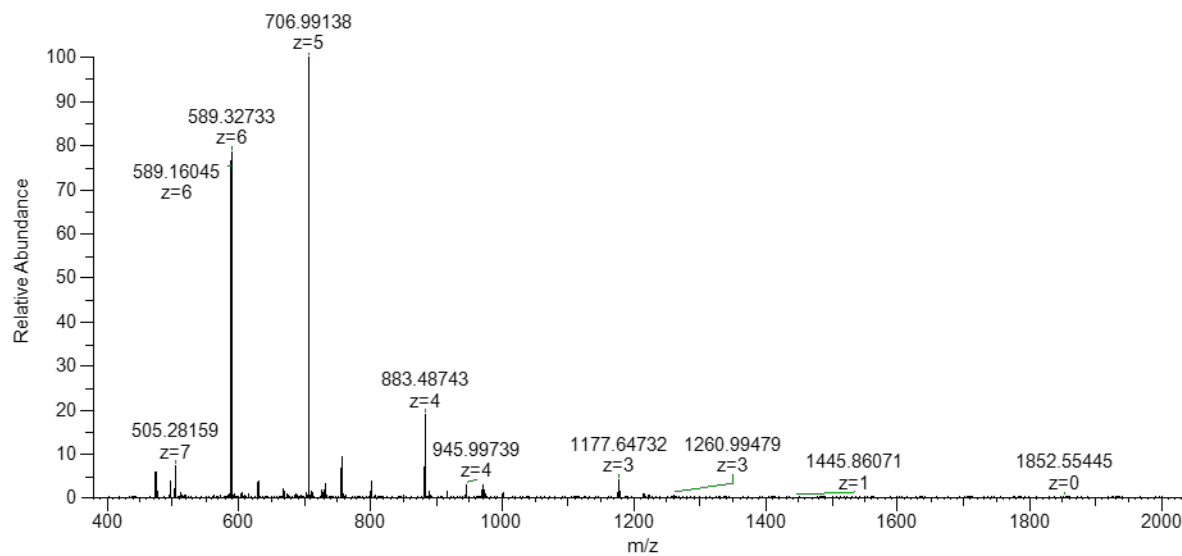

## 1.1 Peptide-PEG Analysis and Characterization

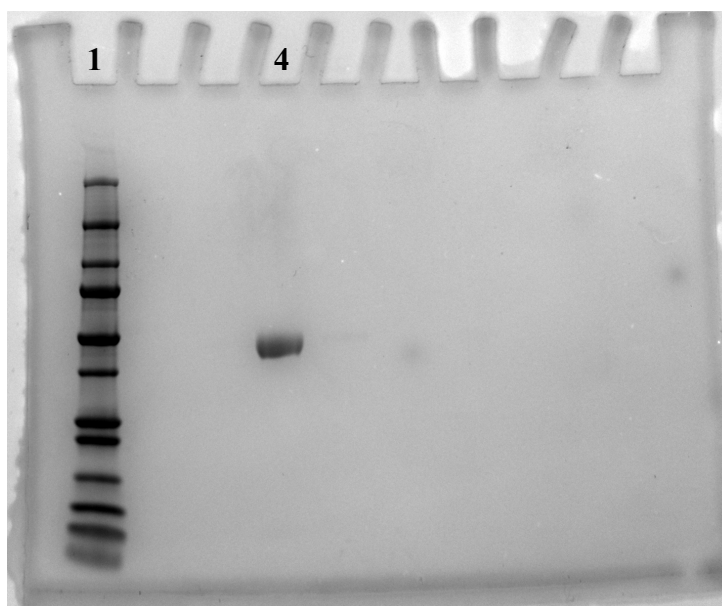

| Lane | Sample     |
|------|------------|
| 1    | ladder     |
| 4    | ANT308-PEG |

## **1.2 Additional Peptide Sequences**

Peptide controls used in the murine studies were purchased from RS Synthesis (Louisville, KY):

Fully SCRAM: YDDHTKLKINTARLVSAQNVFNMLKYR-CONH<sub>2</sub>



### 1.3 Plasma Stability T Cell Activation Study

200  $\mu$ M ANT308 or 200  $\mu$ M ANT308K-PEG were mixed with healthy donors' plasma at 1:1 ratio, followed by incubation at 37°C. Aliquots (150  $\mu$ L) were collected at 24 hrs, 48 hrs, 72 hrs, and 96 hrs and stored at -80°C before pooled human T cells activation assay. Assays were performed with three different donor's plasma.

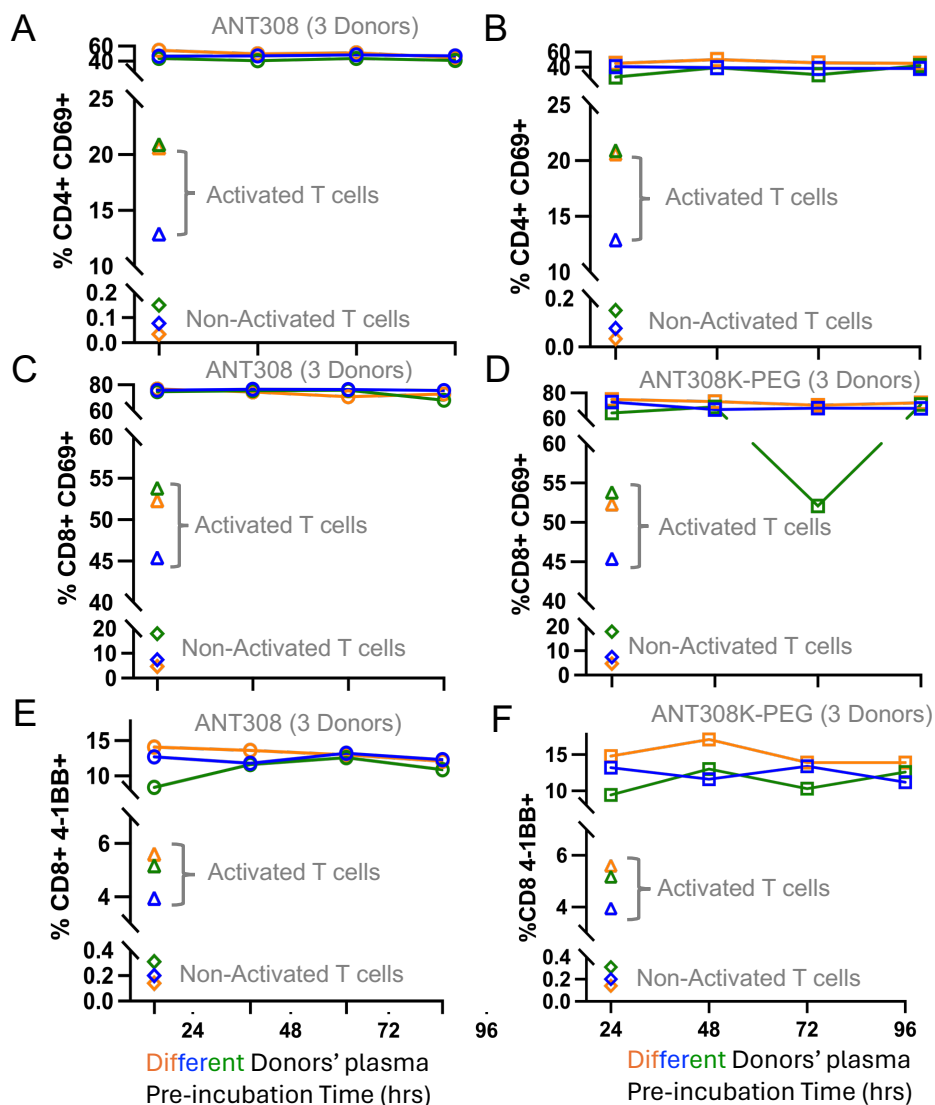

**Figure S1A-F: Plasma stability and human T cells activation.** After incubation with healthy donors' plasma at 37°C for 24hrs, 48hrs, 72hrs, and 96hrs. 10  $\mu$ M ANT308 (A,C,E) or 10  $\mu$ M ANT308K-PEG (B,D,F) were directly mixed with isolated & pooled human T cells with the

presence of  $\alpha$ CD3/CD28 activator and IL-2. 48hrs following activation, CD4 or CD9 T cell subsets were examined for CD69 and 4-1BB expressions.
